# Supplementary material for: An Assessment of the Relationships between Extreme Weather Events, Vulnerability, and the Impacts on Human Wellbeing in Latin America
Source: MDPI journal article supplement (doi:10.3390/ijerph15091802), 2018-08-21
Supplement: s1 [file s1]

| Answer ID | Resume-Code | Start      | Date and time | Participation | 1. 1. What is y       | 2. 2. Please in |
|-----------|-------------|------------|---------------|---------------|-----------------------|-----------------|
| 41315970  | 516df5b     | 13.12.2017 | 19            | 13.12.2017 20 | participated a male   | 31 - 50 years   |
| 41326034  | 41c8458     | 14.12.2017 | 02            | 14.12.2017 02 | participated a female | 20 - 30 years   |
| 41326530  | fe3b624     | 14.12.2017 | 04            | 14.12.2017 04 | participated a male   | 51 - 70 years   |
| 41336105  | 47f24a0     | 14.12.2017 | 11            | 14.12.2017 11 | participated b female | 51 - 70 years   |
| 41351979  | aa8af74     | 14.12.2017 | 17            | 14.12.2017 17 | participated a male   | 31 - 50 years   |
| 41352755  | 74c62ef     | 14.12.2017 | 17            | 14.12.2017 18 | participated a male   | 51 - 70 years   |
| 41352795  | c15a429     | 14.12.2017 | 17            | 14.12.2017 18 | participated a male   | above 70 year   |
| 41353727  | 4bd172e     | 14.12.2017 | 18            | 14.12.2017 18 | participated a male   | 51 - 70 years   |
| 41353810  | f89c69f     | 14.12.2017 | 18            | 14.12.2017 18 | participated a male   | 31 - 50 years   |
| 41353959  | aec24f3     | 14.12.2017 | 18            | 14.12.2017 18 | participated a female | 31 - 50 years   |
| 41354763  | a1e70b5     | 14.12.2017 | 18            | 14.12.2017 18 | participated a female | 31 - 50 years   |
| 41356289  | 78d13b9     | 14.12.2017 | 19            | 14.12.2017 19 | participated a male   | 51 - 70 years   |
| 41357521  | c932aca     | 14.12.2017 | 20            | 14.12.2017 20 | participated a male   | 51 - 70 years   |
| 41373550  | 9d710d4     | 15.12.2017 | 11            | 15.12.2017 11 | participated a female | 31 - 50 years   |
| 41375568  | 83e2a00     | 15.12.2017 | 12            | 15.12.2017 12 | participated a female | 31 - 50 years   |
| 41377448  | 72eb810     | 15.12.2017 | 13            | 16.12.2017 21 | participated a female | 51 - 70 years   |
| 41394013  | be7a4ac     | 15.12.2017 | 22            | 15.12.2017 22 | participated a female | 31 - 50 years   |
| 41410861  | 98654af     | 16.12.2017 | 20            | 16.12.2017 21 | participated a male   | above 70 year   |
| 41424783  | 4d01fa0     | 17.12.2017 | 18            | 17.12.2017 19 | participated a female | 31 - 50 years   |
| 41425418  | d4c0694     | 17.12.2017 | 19            | 17.12.2017 19 | participated a female | 31 - 50 years   |
| 41431756  | 9e868c4     | 17.12.2017 | 23            | 17.12.2017 23 | participated a female | 51 - 70 years   |
| 41441320  | b7af51c     | 18.12.2017 | 11            | 18.12.2017 11 | participated a female | 31 - 50 years   |
| 41447794  | 79c79b8     | 18.12.2017 | 14            | 18.12.2017 14 | participated a female | 51 - 70 years   |
| 41448424  | 6da4b57     | 18.12.2017 | 14            | 18.12.2017 14 | participated b female | 31 - 50 years   |
| 41450060  | 88c42ae     | 18.12.2017 | 14            | 18.12.2017 14 | participated b female | 20 - 30 years   |
| 41451001  | d9bad6f     | 18.12.2017 | 15            | 18.12.2017 15 | participated a female | 51 - 70 years   |
| 41452805  | cadfdad     | 18.12.2017 | 15            | 18.12.2017 15 | participated a female | 51 - 70 years   |
| 41455392  | eacd34f     | 18.12.2017 | 16            | 18.12.2017 17 | participated a male   | 20 - 30 years   |
| 41457810  | a113d73     | 18.12.2017 | 17            | 18.12.2017 17 | participated a female | 31 - 50 years   |
| 41458447  | 1483b01     | 18.12.2017 | 15            | 18.12.2017 21 | participated a male   | 51 - 70 years   |
| 41459200  | 28c954e     | 18.12.2017 | 18            | 18.12.2017 18 | participated a female | 20 - 30 years   |
| 41462899  | 3d89b99     | 18.12.2017 | 19            | 18.12.2017 20 | participated a female | 31 - 50 years   |
| 41466185  | a5cd3f0     | 18.12.2017 | 21            | 18.12.2017 21 | participated a male   | 20 - 30 years   |
| 41471189  | 862ea88     | 19.12.2017 | 00            | 19.12.2017 00 | participated a female | 51 - 70 years   |
| 41627916  | a283d4f     | 26.12.2017 | 13            | 26.12.2017 14 | participated b male   | 31 - 50 years   |
| 41639996  | decd217     | 27.12.2017 | 11            | 27.12.2017 12 | participated a male   | 31 - 50 years   |
| 41644145  | f9e9a1d     | 27.12.2017 | 14            | 27.12.2017 15 | participated a female | 31 - 50 years   |
| 41646706  | dbbe4b0     | 27.12.2017 | 16            | 27.12.2017 17 | participated a male   | 51 - 70 years   |
| 41647976  | 96101a4     | 27.12.2017 | 17            | 27.12.2017 17 | participated a male   | 51 - 70 years   |
| 41653766  | 122f294     | 27.12.2017 | 22            | 27.12.2017 23 | participated a male   | 51 - 70 years   |
| 41655950  | 9a128b6     | 28.12.2017 | 05            | 28.12.2017 05 | participated a male   | 31 - 50 years   |
| 41668495  | ae107ce     | 28.12.2017 | 18            | 28.12.2017 18 | participated a male   | 51 - 70 years   |
| 41681433  | 2be1eeb     | 29.12.2017 | 12            | 29.12.2017 12 | participated a female | 31 - 50 years   |
| 41682907  | 1f4f673     | 29.12.2017 | 13            | 29.12.2017 13 | participated a male   | 51 - 70 years   |
| 41687533  | 93b98f1     | 29.12.2017 | 17            | 29.12.2017 20 | participated a male   | above 70 year   |
| 41691899  | 6a79fd5     | 29.12.2017 | 22            | 29.12.2017 22 | participated a female | 51 - 70 years   |

|                  |               |                                          |               |
|------------------|---------------|------------------------------------------|---------------|
| 41693757 c9ae3b0 | 30.12.2017 02 | 30.12.2017 02 participated a female      | 51 - 70 years |
| 41708783 cb05bf5 | 31.12.2017 12 | 31.12.2017 12 participated a male        | 51 - 70 years |
| 41709119 b8961fa | 31.12.2017 13 | 31.12.2017 13 participated a female      | 51 - 70 years |
| 41709583 96b0ded | 31.12.2017 13 | 31.12.2017 14 participated a male        | above 70 year |
| 41741403 bce441d | 02.01.2018 22 | 02.01.2018 22 participated a female      | 51 - 70 years |
| 41757995 4b93ac3 | 03.01.2018 16 | 03.01.2018 16 participated and completed | 51 - 70 years |
| 41790512 a862b11 | 04.01.2018 20 | 04.01.2018 20 participated a female      | 51 - 70 years |
| 41923054 79b09b6 | 09.01.2018 17 | 09.01.2018 20 participated a female      | 31 - 50 years |

|                 | 3. What is t   | 4. What is y   | 5. What is y              | 6. Please cc | 7. What are storms | storm surges |
|-----------------|----------------|----------------|---------------------------|--------------|--------------------|--------------|
| PhD             | Portugal       | academia       | strongly agree            |              |                    |              |
| Master's degr   | Brazil         | academia       | agree                     | 1            |                    |              |
| PhD             | Ecuador        | academia       | strongly agree            |              |                    |              |
| PhD             | Brazil         | public service |                           |              |                    |              |
| PhD             | Uk             | academia       | strongly agree            |              |                    |              |
| PhD             | Mexico         | academia       | strongly agree            | 1            |                    | 1            |
| PhD             | mexico         | academia       | strongly agree            | 1            |                    |              |
| Bachelor's deç  | USA            | industry       | strongly agree            | 1            |                    | 1            |
| PhD             | Argentina      | academia       | strongly agree            | 1            |                    |              |
| Master's degr   | Colombia       | NGO            | strongly agree            | 1            |                    |              |
| PhD             | UK             | academia       | strongly agree            | 1            |                    | 1            |
| PhD             | Mexico         | academia       | strongly agree            |              |                    |              |
| DEA de lii cycl | Chile          | public service | strongly agree            |              |                    |              |
| PhD             | Brazil         | academia       | neither agree or disagree | 1            |                    |              |
| Pos Doc         | Brasil         | academia       | strongly agree            | 1            |                    |              |
| PhD             | Brasil         | academia       | strongly agree            |              |                    |              |
| PhD             | Guatemala      | academia       | strongly agree            |              |                    |              |
| Master's degr   | AsunciÃ³n - Pa | academia       | strongly agree            |              |                    |              |
| Master's degr   | paraguay       | academia       | strongly agree            | 1            |                    |              |
| Master's degr   | paraguay       | academia       | strongly agree            | 1            |                    |              |
| Master's degr   | uruguay        | public service | agree                     |              |                    | 1            |
| PhD             | Brazil         | academia       | strongly agree            | 1            |                    |              |
| PhD             | Brazil         | public service | agree                     | 1            |                    |              |
| Master's degr   | Brazil         | academia       |                           |              |                    |              |
| PhD             | URUGUAY        | public service | strongly agree            |              |                    |              |
| Master's degr   | Brazil         | academia       | strongly agree            | 1            |                    |              |
| Diploma / Sec   | Brazil         | Student        | agree                     | 1            |                    |              |
| Master's degr   | Brasil         | academia       | strongly agree            | 1            |                    |              |
| Master's degr   | Bolivia        | Free lance cor | strongly agree            | 1            |                    |              |
| Master's degr   | Brazil         | academia       | strongly agree            | 1            |                    | 1            |
| PhD             | Argentina      | public service | agree                     |              |                    |              |
| Bachelor's deç  | Brasil         | academia       | strongly agree            | 1            |                    | 1            |
| Master's degr   | Mexico         | academia       | strongly agree            | 1            |                    |              |
| Master's degr   | Colombia       | industry       |                           |              |                    |              |
| Bachelor's deç  | Brasil         | academia       | strongly agree            |              |                    |              |
| Master's degr   | Nicaragua      | academia       | strongly agree            | 1            |                    |              |
| PhD             | BRAZIL         | academia       | strongly agree            | 1            |                    |              |
| PhD             | Brazil         | academia       | agree                     | 1            |                    |              |
| Master's degr   | Argentina      | public service | strongly agree            |              |                    |              |
| Master's degr   | Brazil         | academia       | strongly agree            |              |                    |              |
| PhD             | Uruguay        | academia       | strongly agree            | 1            |                    | 1            |
| Master's degr   | Venezuela      | academia       | strongly agree            |              |                    | 1            |
| PhD             | Venezuela      | academia       | strongly agree            |              |                    |              |
| PhD             | Venezuela      | academia       | strongly agree            | 1            |                    |              |
| PhD             | Venezuela      | academia       | strongly agree            |              |                    |              |

|                |           |                 |                |   |   |
|----------------|-----------|-----------------|----------------|---|---|
| PhD            | Venezuela | academia        | strongly agree |   |   |
| PhD            | Paraguay  | Civil Society O | strongly agree | 1 |   |
| PhD            | Uruguay   | academia        | strongly agree |   | 1 |
| Master's degr  | Paraguay  | academia        | strongly agree |   |   |
| Master's degr  | Venezuela | academia        | strongly agree |   |   |
| PhD            | Venezuela | academia        | strongly agree | 1 |   |
| PhD            | BOLIVIA   | academia        | strongly agree | 1 |   |
| Bachelor's deg | Mexico    | Consultancy     | strongly agree | 1 |   |

| droughts | heat waves | fires | inundation an | Text field        | 8. 8. Please cc 9. 8.1. If you (: |
|----------|------------|-------|---------------|-------------------|-----------------------------------|
| 1        |            | 1     | 1             |                   | disagree                          |
| 1        |            |       |               | 1                 | disagree                          |
|          |            |       |               | 1                 | agree                             |
|          |            | 1     |               | 1                 | agree                             |
|          |            | 1     | 1             | hurricanes        | strongly disagree                 |
|          |            | 1     |               | 1 earthquakes     | disagree                          |
| 1        |            | 1     | 1             | 1                 | agree                             |
| 1        |            |       | 1             | 1                 | disagree                          |
| 1        |            | 1     | 1             | 1                 | strongly disagree                 |
|          |            | 1     |               | 1                 | neither agree or disagree         |
| 1        |            |       |               | 1                 | neither agree or disagree         |
| 1        |            |       | 1             | 1                 | disagree                          |
|          |            |       | 1             | 1                 | neither agree or disagree         |
| 1        |            |       | 1             | 1                 | agree                             |
| 1        |            |       |               | 1 deforestation   | disagree                          |
|          |            |       |               | hurricanes        | disagree                          |
| 1        |            |       | 1             | 1                 | agree inundation an               |
| 1        |            | 1     |               | 1                 | strongly disagree                 |
| 1        |            | 1     |               | 1                 | disagree                          |
| 1        |            | 1     |               | 1                 | disagree                          |
|          |            |       |               | 1                 | disagree                          |
|          |            | 1     |               | 1                 | disagree                          |
| 1        |            | 1     |               | 1                 | disagree                          |
| 1        |            | 1     | 1             | 1 sea level rise  | strongly disagree                 |
|          |            |       |               | 1 Shallow lands   | disagree                          |
|          |            |       | 1             | 1                 | strongly disagree                 |
| 1        |            | 1     | 1             | 1 Hail            | strongly agree Flood Mamor        |
| 1        |            | 1     | 1             | 1                 | disagree                          |
|          |            |       |               | 1                 | disagree                          |
| 1        |            |       |               | 1 Landslides      | disagree                          |
| 1        |            | 1     | 1             | 1                 | disagree                          |
|          |            |       |               | 1                 | strongly disagree                 |
| 1        |            | 1     | 1             | 1 plagues and ill | disagree                          |
| 1        |            |       | 1             | 1                 | agree Midia reports               |
| 1        |            |       | 1             | 1                 | agree                             |
|          |            | 1     |               | 1                 | strongly disagree                 |
| 1        |            |       |               | 1                 | disagree                          |
| 1        |            |       | 1             | 1                 | disagree                          |
| 1        |            | 1     | 1             | 1                 | strongly disagree                 |
| 1        |            |       |               | 1                 | disagree                          |
| 1        |            | 1     | 1             | 1 Outbreak of n   | neither agree or disagree         |
| 1        |            |       | 1             | 1                 | neither agree or disagree         |

|   |   |   |              |                           |
|---|---|---|--------------|---------------------------|
|   |   |   | 1            | disagree                  |
| 1 | 1 |   | 1            | agree                     |
| 1 | 1 | 1 | 1            | disagree                  |
|   |   |   | 1            | neither agree or disagree |
|   |   |   | 1            | strongly disagree         |
| 1 | 1 | 1 | 1            | strongly disagree         |
| 1 |   | 1 | 1 LANDSLIDES | disagree                  |
| 1 |   |   | 1 hurricanes | strongly disagree         |

|                            |                             |                           |                               |                                                                                        |
|----------------------------|-----------------------------|---------------------------|-------------------------------|----------------------------------------------------------------------------------------|
| 10. 9. 'I think I disagree | 11. 10. 'I think I disagree | 12. 10.1. If you disagree | 13. 11. Is there I don't know | 14. 11.1. If 'yes', please provide examples: Effective Implementation of NAPs, NAS and |
| disagree                   | strongly disagree           | neither agree or disagree | yes                           | More education at all levels                                                           |
| strongly agree             | disagree                    |                           | I don't know                  |                                                                                        |
| strongly disagree          | strongly disagree           |                           | yes                           | Clima change is related also with pollutants                                           |
| strongly disagree          | strongly disagree           |                           | yes                           | eliminate the pattern of systematic discrim                                            |
| disagree                   | disagree                    |                           | yes                           |                                                                                        |
| disagree                   | disagree                    |                           | yes                           | Early warning systems, Risk management ,                                               |
| strongly disagree          | strongly disagree           |                           | yes                           | Education, awareness, public policies                                                  |
| agree                      | neither agree or disagree   |                           | no                            |                                                                                        |
| neither agree              | disagree                    |                           | yes                           | In my country there is a lack of information                                           |
| disagree                   | strongly disagree           |                           | yes                           | We should develop effective and actualized                                             |
| disagree                   | neither agree or disagree   |                           | I don't know                  |                                                                                        |
| disagree                   | disagree                    |                           | yes                           | AtravÃ©s da gestÃ£o de risco, do monitor                                               |
| disagree                   | strongly disagree           |                           | yes                           | The development of public policies, massiv                                             |
| disagree                   | disagree                    |                           | yes                           | Proper information, vulnerability and risk a                                           |
| neither agree              | agree                       | Paraguay in th            | yes                           | Prioritize to programs and projects and res                                            |
| strongly disagree          | strongly disagree           |                           | yes                           | 1- Research, 2- Public politics, 3- Engage all                                         |
| strongly disagree          | disagree                    |                           | yes                           | research, public politics, engage all stakehc                                          |
| neither agree              | disagree                    |                           | I don't know                  |                                                                                        |
| disagree                   | disagree                    |                           | yes                           | - Investments in education, and lifelong lea                                           |
| disagree                   | disagree                    |                           | yes                           | Teach about this relation on elementary an                                             |
| disagree                   | neither agree or disagree   |                           | yes                           | Formulate a National Health Adaptation Pl                                              |
| disagree                   | strongly disagree           |                           | yes                           | Campaigns with informations about the eff                                              |
| strongly disagree          | strongly disagree           |                           | yes                           | More investment to researches and develo                                               |
| disagree                   | disagree                    |                           | no                            |                                                                                        |
| strongly disagree          | disagree                    |                           | yes                           | Development local and national early warn                                              |
| strongly disagree          | strongly disagree           |                           | yes                           | I believe that among the long-term measur                                              |
| neither agree              | disagree                    |                           | yes                           | At national Level with Health Ministry we                                              |
| strongly disagree          | strongly disagree           |                           | I don't know                  |                                                                                        |
| strongly disagree          | strongly disagree           |                           | yes                           | Improve early warning systems, , Develop r                                             |
| strongly disagree          | strongly disagree           |                           | yes                           | One idea is to promote integrative health a                                            |
| disagree                   | disagree                    |                           | yes                           | Improve partnerships inside country, and S                                             |
| disagree                   | disagree                    |                           | yes                           | Change patterns of production and consurr                                              |
| disagree                   | strongly disagree           |                           | yes                           | Have a good health system                                                              |
| neither agree              | disagree                    |                           | yes                           | mitigation of climate change (not a priority                                           |
| disagree                   | strongly disagree           |                           | I don't know                  |                                                                                        |
| agree                      | neither agree or disagree   |                           | yes                           | To improve modelling, observation, foreca:                                             |
| strongly disagree          | strongly disagree           |                           | yes                           | Inform the population, sensitize the popula                                            |
| disagree                   | strongly disagree           |                           | yes                           | Capacity building in climate change and he:                                            |
| disagree                   | disagree                    |                           | yes                           | 1. Promote at the country level programs t                                             |
| strongly disagree          | disagree                    |                           | no                            |                                                                                        |

|                |                   |                 |     |
|----------------|-------------------|-----------------|-----|
| strongly disag | strongly disagree |                 | yes |
| disagree       | disagree          |                 | yes |
| strongly disag | strongly disagree |                 | yes |
| neither agree  | agree             | There is a syst | yes |
| disagree       | disagree          |                 | yes |
| strongly disag | strongly disagree |                 | yes |
| disagree       | disagree          |                 | yes |
| disagree       | disagree          |                 | yes |

Developing early warning systems would b  
 knowledge to the general citizenship, actio  
 The occurrence of diseases present in the r  
 supports further research on the subject ar  
 The Academy of Science.  
 If authorities already have the knowledg  
 Develop integral climate change health ad  
 Act urgently to tackle the root of the probl



at the municipalities the LAPs (local adaptation plans) in the sectorial strategies (namely Health sector)

s in aquifers. High concentration levels of pollutants are cumulated in dry seasons because there is  
mination and exclusion and pretend that because people have a card they can get attention from instit

Emergency response and epidemiological data from events

to the public about the subject

channels of integrated scientific information (IPCC A5R), in accordance with platforms, mechanisms

amento e das ações de prevenção.

disclosure in media, scholar education and researches.

assessments that can transform into adequate planning and risk management.

earch in the field of climate change and also the application of technologies in agriculture, where climate

stake holders as community, universities, public sector, NGO.

olders

arning and infrastructure are the solution to improve the life quality of the population, in terms of providing

id medical schools, Teach the population how to recognize vulnerable situations and/or sites, Warn the

an., Prepare Training Programs on Climate Change and Health for the health sector work teams., For the

jects of climate change,, Effective fiscalization of buildings in risk areas

mpment of technicians to avoid the most of the social and economic damages.

ning systems it should be articulated with hospital attendances., Health systems in Bolivia have collapsed

es can be the implementation of disaster culture through basic education and increase nature protection

are attempting to identify high risk areas of flooding in Argentina and we are attempting to associate the

risk maps at local level, , Improve risk communication in vulnerable areas, and in vulnerable population

is the integration of healthy people living on a healthy planet. People usually have the concept of health

outh-South and North-South cooperation., Promote best practices, increase the climate-health nexus

option

r in Argentina, quite the opposite), association of research and health experts with those in Brazil especially

st and early warning systems, , Improve research on vulnerable sites and people,, Improve preparedness

ation on this issue, educate the children and prepare them for an imminent change. Generate defense

alth issues a different level, Increase the adaptation programs or project at local level., More access to

o empower the community on the potential effects of climate change on health., 2. Develop information

is an excellent resource, with widespread information to the society in a simple way so the information plans for emergencies  
The region due to the effects of climate change (increase in temperature and precipitation) looms over our world and we must use communications from it, by the responsible organisms

And about the areas in the country that will be strongly impacted by the climate change, they should begin Adaptation Plans  
This is a global scale: human-induced climate change! In this, we all have a role to play, and we must

or) , and promoting Climate Literacy to general publics, school publics/students (namely Public Health

not high flow of groundwater. 30% of the people drinking water of Wells and sinkholes in the South  
tutions in the public system

and tools of the UNFCCC (APA21), Talanoa Dialogues (Fidji-Bonn COP 23), to all levels of the State, pri

mate change impacts the most impact and also in health and in the economy, because the conseque

event diseases.

he population in advance on any abrupt change on the weather forecast, Provide the population list

ulate Environmental Health Indicators linked to climate change and the health status of the populat

psed under normal conditions, so management in emergency care should be improved.

ction programs.

he main factors with the most flood related diseases in Argentina. This priority areas could help to c

ons (children, women, elderly, disable people), , Improved epidemiological surveillance regarding dise

alth as an individual attribute. The XXI century needs the integrations os self-care, care for the other a  
s research communication at several levels.

pecially for tropical diseases (Chagas etc...)

ness, readiness and coordination at all levels (National, Regional, Local)

e and prevention mechanisms to increase the resilience of social systems in the face of extreme clima

o financial support for project in climate change, Involve the medical community in the climate chang

tion campaigns in the mass media and through social networks., 3. Promote at all levels of formal ed

on can be reached to most of the population.

in country., The health system is not prepared., The university is not training its professionals for these

to provide credits to these potentially affected population to buy or to rent a second house, we have

play it to our fullest capacity.

h and Health higher education institutions) and segmented publics (namely the media).

of Mexico, in Yucatán, , Is necessary programs to monitoring pollutants under sceneries of Climate

vates and Organisations, to make real conscience of the planetary dangers we are immersed in.

nces of climate change have a direct impact on the economy.

of to do things in case of extreme events, Begin to consider those factors in land use policy

tion, including information related to the burden of diseases associated with climate change., Implem

live resources, vaccines and other basic tools to more frequently affected regions, More informatior

ases associated to hidrometeorological events

and care for the whole planetary ecosystem. There is a need for a new ethos (neoethos) in our health

ate changes.

ge theme

ucation the topic of climate change, and especially on the issues associated with health., 4. Design pr

ie contingencies., We are not implementing adequate information campaigns and awareness of the p

è the experience of the traumatic floods in 1999 in Vargas, coastal area in venezuela, thousands peop

e Change, and Promotion Health Programs to face Climate Change and their impact to the Public Health

ent predictive models of the behavior of vector diseases and zoonoses, associated with climate change

about prevention in media is needed.

professions, we need to transform our paradigms of health.

programs to increase the capacity of response in the area of health, of the official organizations before

population about the risks we will have in the near future.

He died, and thousand were displacement, the reconstruction was very difficult and is still on going, a



th., , I would like to participate to development a educational program in my country, mainly at Maya

ge., Develop and implement a National Plan for prevention of diseases transmissible by vectors sensi

potential risks derived from climate change and extreme events.

at that time it was a surprising event, but right now with all the studies it is possible to prevent these

Región sur de México. We have evidence of high levels of pollutants in winter and their bioacc

itive to climate change., Develop and implement an early warning system for extreme temperature e

consequences.

accumulation in the human being.

vents (heat and cold waves) and it is in execution in at least two departments of the country., To forr



mulate a diagnosis of the response capacity and the infrastructure of health care services and centers





; in the face of extreme weather-related events.
